# Supplementary material for: Translating across macroscopic, submicroscopic, and symbolic levels: the role of instructor facilitation in an inquiry-oriented physical chemistry class
Source: Royal Society of Chemistry journal article supplement (doi:10.1039/c5rp00064e), 2015-01-01
Supplement: c5rp00064e1.pdf [file c5rp00064e1.pdf]

## Appendix A

### Definition of Analytical Categories and selected examples

Toulmin's Model of Argumentation

Definitions adapted from Toulmin (1958).

| Argument Component | Description                                                                                                                                                                                                                                      |
|--------------------|--------------------------------------------------------------------------------------------------------------------------------------------------------------------------------------------------------------------------------------------------|
| Claim              | A conclusion whose merit must be established. This is a statement that you are asking others to accept.                                                                                                                                          |
| Data               | The facts one appeals to as a foundation for the claim. These are the facts used to support and provide reasoning for the claim.                                                                                                                 |
| Warrant            | A statement bridging the claim and data, thus legitimizing the claim by showing the data to be relevant.                                                                                                                                         |
| Backing            | Generalizations that refer to basic assumptions that are used to establish the trustworthiness of the argument. Backings provide additional support to the warrant.                                                                              |
| Qualifier          | Indicates the strength conferred by the warrant and may limit how universal the claim is.                                                                                                                                                        |
| Rebuttal           | Challenges made to the claim, data, or warrant. The rebuttal indicates circumstances in which the general authority of the warrant must be set aside. These statements recognize the restrictions that may legitimately be applied to the claim. |

## Appendix B

Definition of Analytical Categories and selected examples  
 Representational Levels- Symbolic, Sub-Microscopic, and Macroscopic Coding Definitions

### *Symbolic Level Codes*

| Sub-code                           | Description                                                                                                                                                                                  |                                                                                   |
|------------------------------------|----------------------------------------------------------------------------------------------------------------------------------------------------------------------------------------------|-----------------------------------------------------------------------------------|
| Mathematical                       | Claim, evidence, or reasoning related to the validity of a mathematical expression under a particular set of conditions                                                                      |                                                                                   |
|                                    | Related to how quantities will change with respect to one another according to a particular mathematical representation (relates to qualitative interpretation of a mathematical expression) |                                                                                   |
|                                    | Related to the sign or value of a quantity NOTE: more general claims about macroscopic quantities such as enthalpy can be coded as macroscopic                                               |                                                                                   |
|                                    | Known equations when appealed to as evidence                                                                                                                                                 | Algorithmic – explanation appeals to procedure of obtaining a mathematical result |
|                                    |                                                                                                                                                                                              | Qualitative - student interprets what the mathematical expression means           |
| Graphical or Numerical Data        | Prediction of shape of graph, slope of line, etc.                                                                                                                                            |                                                                                   |
|                                    | Appeal to graph feature or numerical trend observed in data                                                                                                                                  |                                                                                   |
| Physical Model                     | Appeal to features of physical model or drawing                                                                                                                                              |                                                                                   |
| Model of Composition and Structure | Appeal to information from balanced equation                                                                                                                                                 |                                                                                   |
|                                    | Appeal to information from chemical formula                                                                                                                                                  |                                                                                   |
| Definitions and Rules              | Fundamental description of concept                                                                                                                                                           |                                                                                   |

***Sub-Microscopic Level Codes***

| Sub-code              | Description                                                                                                                |
|-----------------------|----------------------------------------------------------------------------------------------------------------------------|
| Atomic/Molecular      | Claim, evidence or reasoning related to molecular structure                                                                |
|                       | Includes discussion of presence or absence of bonds and molecular geometry                                                 |
|                       | References to properties of atoms when not referring to sub-atomic particles                                               |
| Multi-particle        | Claim, evidence or reasoning related to motion or spacing of particles or nature of interaction between multiple particles |
|                       | Includes references to electrical interactions between two or more particles                                               |
|                       | Excludes discussion of electrical interactions within atoms or molecules                                                   |
| Definitions and Rules | Fundamental description of concept                                                                                         |

***Macroscopic Level Codes***

| Sub-code                | Description                                                                                                                                                                                                                                                                                                                                                                        |
|-------------------------|------------------------------------------------------------------------------------------------------------------------------------------------------------------------------------------------------------------------------------------------------------------------------------------------------------------------------------------------------------------------------------|
| Macro-Concrete          | Claim, evidence, or reasoning related to measurable physical properties of system including mass, temperature, pressure, volume                                                                                                                                                                                                                                                    |
|                         | Concrete in this context is used to refer to properties that can in some way be experienced or measured directly                                                                                                                                                                                                                                                                   |
| Macro-Abstract          | Claims about properties of the system which are not directly measurable including enthalpy, entropy, Gibbs energy, work, heat capacity, or heat. <b>NOTE:</b> Appeals to T, V, etc. when used as variables in a mathematical expression in explaining how one quantity would vary with respect to another would not be considered “macroscopic”; they would be considered symbolic |
| Macroscopic Observation | Relates to experience of phenomena or observation                                                                                                                                                                                                                                                                                                                                  |
| Definitions and Rules   | Fundamental description of concept                                                                                                                                                                                                                                                                                                                                                 |

## Appendix C

Inquiry Oriented Discursive Moves Coding Definitions.  
 Definitions adapted from Marrongelle & Rasmussen (2008).

**Revoicing.** Revoicing is defined as reuttering or saying again (this could be verbal, symbolic, or gestural) – of someone else’s utterances.

| Revoicing Category | Description                                                                                    | Example                                                                                                                                                                                 |
|--------------------|------------------------------------------------------------------------------------------------|-----------------------------------------------------------------------------------------------------------------------------------------------------------------------------------------|
| Repeating          | Teacher repeats a student’s utterance using (essentially) the same words or a portion thereof. | S: As the reaction occurs the piston moves up because there is an increase in moles.<br>T: my volume is gonna go up because our moles is going up                                       |
| Rephrasing         | Teachers states a student’s utterance in a new or different way                                | S: $dS$ , $dV$ , and $dU$ are exact differentials.<br>T: all of these variables are state functions.                                                                                    |
| Expanding          | Teacher adds information to a student’s utterance                                              | S: Volume is a state function because you can use the final volume and the initial volume.<br>T: So my change in volume doesn't depend on the path I use to get there, just what it is. |
| Reporting          | Teacher attributes an idea, claim, or argument to a specific student.                          | T: So when the weight's removed, like Mary said, it's gonna expand till I can restore equilibrium.                                                                                      |

**Questioning.** We used questioning codes in cases when there was an expectation that students actually respond or take action (as opposed to rhetorical questions).

| Questioning Category | Description                                                                                                                                                                                                                      | Example                                                                                                                                                                                                                                                                                                                                       |
|----------------------|----------------------------------------------------------------------------------------------------------------------------------------------------------------------------------------------------------------------------------|-----------------------------------------------------------------------------------------------------------------------------------------------------------------------------------------------------------------------------------------------------------------------------------------------------------------------------------------------|
| Evaluating           | The intention is to check for understanding against what the teacher sees as an expected response.                                                                                                                               | T: What does $dH$ equal at constant pressure?<br>S: $dH = dU + PdV$                                                                                                                                                                                                                                                                           |
| Clarifying           | Purpose of the request is to seek clarification of detail what a student is saying.<br>a. Request for clarification is directed to the speaker<br>b. Request for clarification is direction to someone other than the speaker    | T: We're going to have reactions that have a negative entropy change. The substances won't, and for it to be spontaneous what has to be true?<br>S: It's positive?<br>T: What's positive?<br>S: The entropy?<br>T: The entropy of what?<br>S: Of the reaction? Of the substance?                                                              |
| Explaining           | Intention is for student(s) to share ideas however tentative. (Could be in question or request form.)<br>a. Requests to explain your/group's thinking<br>b. Requests to explain or comment on another student's/group's thinking | T: Ok, so what are some first impressions? You don't have to be right. Just kind of what are your first impressions about what's going on here.<br>S1: Well, we said that because there is constant motion for, it must be a positive for it to move<br>S2: we said that things are always moving, things always move from order to disorder. |
| Justifying           | Requests to provide warrants or backing for a some conclusion                                                                                                                                                                    | T: Why are all entropies positive?<br>S: Because you can't go lower than zero degrees Kelvin, and at zero degrees there's no movement so the entropy's zero.                                                                                                                                                                                  |

**Telling.** Telling is an important, but often underemphasized, part of a teachers' repertoire

| Telling Category                | Description                                                                                                                                                                                                                                                                | Example                                                                                                                                                                                                                                                                                                 |
|---------------------------------|----------------------------------------------------------------------------------------------------------------------------------------------------------------------------------------------------------------------------------------------------------------------------|---------------------------------------------------------------------------------------------------------------------------------------------------------------------------------------------------------------------------------------------------------------------------------------------------------|
| Initiating                      | a. Describing or presenting a <i>new</i> concept, representation, procedure, solution method, etc.<br>b. Telling students what problem they are to work on next. Involves some contextualization of task.<br>c. Reminding students of conclusions from a previous problem. | T: So in our first model we have our system here, our piston/cylinder thing that we've been analyzing as we go through. We've made one change now, we have indicated the surroundings because when we look at energy exchange, we're looking at the exchange between the system and the surroundings.   |
| Facilitating students' progress | a. Providing information that students need, for a task that students are in the midst of working on.<br>b. Reminding students of a conclusion or a way to think about a problem for which there has already been some agreement or public voicing.                        | T: So I should clarify that, we're not talking about the entropy of a reaction, we're talking about the entropy of a substance.                                                                                                                                                                         |
| Responding to students          | a. Answering a direct student question.<br>b. Evaluating a student utterance, can add additional reasoning                                                                                                                                                                 | S: You can substitute in $nRT/V$ for $P$ because we are working with ideal gas.<br>T: That correct.                                                                                                                                                                                                     |
| Summarizing                     | This discursive move summarizes ideas, highlights particular mathematics of importance, and/or points to next steps related to the summary.                                                                                                                                | T: So when we look at heats of formation, you have to do it from the elements. And so when you look at the table in the back of your book that gives you all of those heats of formation, they calculated what the heat of reaction for this, and then we can just add all of those reactions together. |

**Managing.** Teachers, like a general manager at most any company, typically engage in actions that organize their workers in both structural and affective ways.

| Managing Category | Description                                                                                  | Example                                                                                                               |
|-------------------|----------------------------------------------------------------------------------------------|-----------------------------------------------------------------------------------------------------------------------|
| Arranging         | Classroom management of physical space or arrangement of work space or work tasks.           | T: Let's look at the focus question for T2. You guys have got a minute to come up with an answer in your small group. |
| Directing         | Mathematical management that directs students to carry out a particular mathematical action. | T: Take the total differential for $H = H(T,P)$                                                                       |
| Motivating        | Provides encouragement or motivation for students                                            | T: That's a really good question.                                                                                     |
| Checking          | Check on current status of student progress                                                  | T: Does this make sense? Yes, no, maybe?                                                                              |
